# Supplementary material
Source: ML conference proceedings conference paper supplement (https://openreview.net/forum?id=kdXIBcWW7m)
Supplement: supplementary_material [file attachment]

## A LLM USAGE

Large Language Models (LLMs) are used to aid in the writing and polishing of the manuscript. Specifically, we use an LLM to assist in refining the language, improving readability, and ensuring clarity in various sections of the paper. The model helps with tasks such as sentence rephrasing, grammar checking, and enhancing the overall flow of the text.

It is important to note that the LLM is not involved in the ideation, research methodology, or experimental design. All research concepts, ideas, and analyses are developed and conducted by the authors. The contributions of the LLM are solely focused on improving the linguistic quality of the paper, with no involvement in the scientific content or data analysis.

The authors take full responsibility for the content of the manuscript, including any text generated or polished by the LLM. We ensure that the LLM-generated text adheres to ethical guidelines and does not contribute to plagiarism or scientific misconduct.

## B REFINEMENT METHODS AND OPTIMIZATION ANALYSIS

The refinement methods can be categorized into three levels: (1) Enhancement by Distraction (Low HI), (2) Enrichment by Cross-Disciplinary Integration (Medium HI), and (3) Expert-Driven Refinement (High HI). Below, we present examples of each method, comparing the original questions with their refined versions and analysing the enhancement process. The differences between the original and refined versions are highlighted in red.

### 1. ENHANCEMENT BY DISTRACTION (LOW HI)

#### Original Question

**Original Question:** A protocol suite is ()=.

- A) A set of protocols.
- B) A hierarchical collection of protocols.

#### Refined Question

**Refined Question:** Regarding protocol suites, which of the following statements is correct? ()

- A) **TCP/IP only includes two** protocols.
- B) **The OSI model has seven layers**, each corresponding to a specific protocol in a suite.
- C) **HTTP is not part of any protocol suite.**
- D) **FTP operates independently of any protocol suite.**

**Analysis:** The refined version builds upon the original options by expanding the abstract terms “a set of protocols” and “a hierarchical collection of protocols” through the inclusion of concrete examples such as TCP/IP, OSI, HTTP, and FTP. This enrichment enhances the informational depth of the question and elevates its professional and technical specificity, thereby reducing the probability of correct guessing and strengthening the assessment’s effectiveness in evaluating true conceptual understanding.

## 2. ENRICHMENT BY CROSS-DISCIPLINARY INTEGRATION (MEDIUM HI)

## Original Question

**Original Question:** Given an element with a maximum oxidation state of +7, determine its period and group.

## Refined Question

**Refined Question:** Elements A, B, C, and D are from period 4:

- A forms a 1:1 compound with an oxidation state of +7;
- B is a d-block element with an oxidation state of +7;
- C is in the same period and has the same oxidation state as B;
- D is the most electronegative element in the set.

Fill in the table below and order the four elements by electronegativity from high to low.

|   | Element | Symbol | Period | Group | Max Oxidation |
|---|---------|--------|--------|-------|---------------|
| A |         |        |        |       |               |
| B |         |        |        |       |               |
| C |         |        |        |       |               |
| D |         |        |        |       |               |

Table 4: Element Properties

**Analysis:** The refined question improves upon the original by integrating cross-disciplinary knowledge and contextual clues, promoting higher-order thinking. While the original question only asked students to identify the period and group of an element with a +7 oxidation state—requiring basic recall—the revised version introduces four elements from period 4, each with specific properties tied to oxidation states, electronegativity, and element classification. Students must analyze multiple clues, apply periodic trends, and reconcile inconsistencies (e.g., fluorine not being in period 4), which fosters critical thinking. They also complete a table and rank elements by electronegativity, combining factual knowledge with synthesis and evaluation. This enhancement increases cognitive demand, integrates multiple chemistry concepts, and reduces guessing, transforming a simple recall question into a comprehensive reasoning task.

## 3. EXPERT-DRIVEN REFINEMENT (HIGH HI)

## Original Question

**Original Question:** A machine has a 16-bit instruction field and a 6-bit address field. If the opcode is 8 bits long, how many 0-address instructions are possible?

## Refined Question

**Refined Question:** A machine uses 16-bit instruction words and 6-bit operand addresses. Assume the opcode length is fixed, with instructions in three formats: 0-, 1-, and 2-address. Given M 0-address and N 1-address instructions, what is the maximum number of 2-address instructions? If the opcode length is variable, what is the maximum number of 2-address instructions?

**Analysis:** The refined question improves upon the original by introducing multiple instruction formats (0-, 1-, and 2-address) and asking students to calculate the maximum number of 2-address instructions under both fixed and variable opcode length assumptions. This requires a deeper understanding of instruction encoding and opcode space management. Unlike the original, which involved a simple calculation based on fixed field sizes, the enhanced version tests students' ability to analyze how opcode and address fields are shared across different instruction types, apply multi-step reasoning to maximize opcode space under architectural constraints, and understand advanced encoding techniques such as opcode expansion in variable-length models. By embedding theoretical concepts into a practical design problem, the question promotes higher-order thinking and better assesses students' grasp of computer architecture principles.

## C DIFFICULTY-STRATIFIED SAMPLES

### 💡 Easy Sample

**Question:**

Regarding the structures of PROM and PAL, which of the following statements are correct? ()

- A) PROM has a fixed AND array that is not programmable
- B) Both AND array and OR array of PROM are not programmable
- C) Both AND array and OR array of PAL are programmable
- D) The AND array of PAL is programmable

**Answer:** AD

**Discipline:** Engineering and Technological Sciences

**Field:** Electronics and Communication Technology

**Subfield:** Electronic Technology

**Question:**

According to the causes of dyspnea and its manifestations, dyspnea can be divided into \_\_\_\_\_, \_\_\_\_\_, \_\_\_\_\_ three types.

**Answer:** inspiratory dyspnea, expiratory dyspnea, mixed dyspnea

**Discipline:** Agricultural Sciences

**Field:** Animal Husbandry and Veterinary Science

**Subfield:** Veterinary Medicine

**Question:**

The main issues to note when designing a social survey research plan are ().

- A. Practicality B. Systematicness C. Timeliness D. Economy E. Accuracy F. Flexibility

**Answer:** ABCDF

**Discipline:** Social Sciences and Humanities

**Field:** Sociology

**Subfield:** Sociological Methods

**Question:**

Among the following drugs, those with optical activity are ( )

A. Ranitidine B. Ephedrine C. Pethidine D. Omeprazole E. Naproxen

**Answer:** ABCDE

**Discipline:** Medical Sciences

**Field:** Pharmacy

**Subfield:** Medicinal Chemistry

**Question:**

Judge whether the following statement is correct: According to the change law of the resistance coefficient along the path, the Nikuradse experimental curve is divided into three regions.

**Answer:** False

**Discipline:** Natural Sciences

**Field:** Mechanics

**Subfield:** Fluid Mechanics

**Q Middle Sample**

**Question:** The Foreign Trade Import and Export Service Company under the Foreign Trade Bureau of City A signed a sales contract with Enterprise B of City A. A dispute arose during the performance of the contract. Later, the Foreign Trade Import and Export Service Company was divided into two separate legal entities: the Foreign Trade Commodity Trading Company of City A and the Import and Export Service Company of City A. No arrangements were made regarding the aforementioned sales contract during the division. Now, Enterprise B has filed a lawsuit in court over the contract dispute. The defendant(s) in this lawsuit should be ( )

- A) The Foreign Trade Import and Export Service Company of City A
- B) The Foreign Trade Bureau of City A
- C) Either the Foreign Trade Commodity Trading Company of City A or the Import and Export Service Company of City A
- D) Both the Foreign Trade Commodity Trading Company of City A and the Import and Export Service Company of City A

**Answer:** C

**Discipline:** Social Sciences and Humanities

**Field:** Law

**Subfield:** Sectoral Law

**Question:**

Determine whether the following statement is correct: Both the in-duct dilution probe and the out-of-duct dilution probe use critical sonic orifice sampling.

**Answer:** False

**Discipline:** Engineering and Technological Sciences

**Field:** Environmental Science and Technology and Resource Science and Technology  
**Subfield:** Environmental Engineering

**Question:**

The damage caused by above-zero low temperature to thermophilic plants is generally divided into two steps:

Step 1: \_\_\_\_\_, Step 2: \_\_\_\_\_

**Answer:** Change in membrane phase / Membrane phase transition; Death resulting from metabolic disorder due to membrane damage

**Discipline:** Agricultural Sciences

**Field:** Agronomy

**Subfield:** Basic Agricultural Sciences

**Question:**

What is the natural reaction method? What is its application value in infant research?

**Answer:**

1. Definition: By examining the innate reflex activities of infants and young children, make inferences on the development and changes of their psychological abilities and their essence.

2. Application value:

- Many innate reflexes have important survival value
- Typical examples: visual tracking and cliff response

**Discipline:** Natural Sciences

**Field:** Psychology

**Subfield:** Developmental Psychology

**Question:**

Which of the following statements about weighted imaging is correct?

- A) T1WI is the T1 value map of tissue
- B) Proton density affects signal intensity in any pulse sequence image
- C) The longer the T1 value of tissue, the higher the signal on T1WI
- D) The longer the T2 value of tissue, the lower the signal intensity
- E) T2WI refers to imaging parameters that extend the tissue's T2 value

**Answer:** A

**Discipline:** Medical Sciences

**Field:** Basic Medical Sciences

**Subfield:** Radiology

 **Hard Sample**
**Question:**

A certain machine has an instruction word length of 16 bits, and each operand's address code is 6 bits. Assume the opcode length is fixed, and instructions are divided into three formats: zero-address, one-address, and two-address. If there are  $M$  zero-address instructions and  $N$  one-address instructions, what is the maximum number of two-address instructions? If the opcode length is variable, what is the maximum number of two-address instructions allowed?

**Answer:**

- 1) If a fixed-length opcode is used, the two-address instruction format is as follows:  
Let  $K$  be the number of two-address instructions. Then

$$K = 2^4 - M - N$$

When  $M = 1$  (minimum) and  $N = 1$  (minimum), the maximum number of two-address instructions is

$$K_{\max} = 16 - 1 - 1 = 14.$$

- 2) If a variable-length opcode is used, the two-address instruction format is still as shown in 1), but the opcode length can vary with the number of address codes. In this case,

$$K = 2^4 - \left( \frac{N}{2^6} + \frac{M}{2^{12}} \right).$$

When  $\frac{N}{2^6} + \frac{M}{2^{12}} \leq 1$ ,  $K$  is maximized. So the maximum number of two-address instructions is

$$K_{\max} = 16 - 1 = 15$$

(leaving one encoding as an extension flag).

**Discipline:** Engineering and Technological Sciences

**Field:** Computer Science and Technology

**Subfield:** Computer System Architecture

**Question:**

It is known that two of the following four statements are true.

- 1) Everyone in Class A is from Shanghai.
- 2) Zhao Yun in Class A is from Shanghai.
- 3) Some people in Class A are from Shanghai.
- 4) Some people in Class A are not from Shanghai.

Question: Can we determine whether Zhao Yun in Class A is from Shanghai?

**Answer:** Cannot be determined

**Discipline:** Social Sciences and Humanities

**Field:** Philosophy

**Subfield:** Logic

**Question:**

The pharmacological effects of thiazide diuretics include: ( )

- A) Antihypertensive effect
- B) Decrease in glomerular filtration rate
- C) Increase in blood glucose levels
- D) Increase in urate excretion
- E) Antidiuretic effect

**Answer:** ABCE

**Discipline:** Agricultural Sciences

**Field:** Animal Husbandry and Veterinary Science

**Subfield:** Veterinary Medicine

**Question:**

Some *Nocardia* species are acid-fast positive, but only with \_\_\_\_\_.

Prolonged decolorization renders them negative, which helps differentiate them from \_\_\_\_\_ bacteria. **Answer:** 1% hydrochloric acid ethanol; *Mycobacterium tuberculosis*

**Discipline:** Medical Sciences

**Field:** Basic Medical Sciences

**Subfield:** Medical Microbiology

**Question:**

Suppose  $\{N(t), t \geq 0\}$  is a Poisson process with intensity  $\lambda$ ,  $X_n$  ( $n \geq 1$ ) represents the time interval between the  $(n-1)$ st and  $n$ th event, then  $\mathbb{E}(X_1 \mid N(t) = 1) =$  \_\_\_\_\_.

**Answer:**  $t/2$

**Discipline:** Natural Sciences

**Field:** Mathematics

**Subfield:** Probability Theory

## D THE SUBFIELD OF EESE-POOL

### 1. NATURAL SCIENCES

| Natural Sciences                        |                                                                         |
|-----------------------------------------|-------------------------------------------------------------------------|
| Field                                   | Subfield                                                                |
| Mathematics                             | A1: History of Mathematics (35)                                         |
|                                         | A2: Algebra (48)                                                        |
|                                         | A3: Geometry (34)                                                       |
|                                         | A4: Function Theory (155)                                               |
|                                         | A5: Ordinary Differential Equations (207)                               |
|                                         | A6: Probability Theory (263)                                            |
|                                         | A7: Mathematical Statistics (80)                                        |
|                                         | A8: Discrete Mathematics (79)                                           |
|                                         | A9: Mathematical Logic and Foundations (80)                             |
|                                         | A10: Number Theory (80)                                                 |
|                                         | A11: Algebraic Geometry (80)                                            |
|                                         | A12: Topology (80)                                                      |
|                                         | A13: Mathematical Analysis (85)                                         |
|                                         | A14: Integral Equations (81)                                            |
|                                         | A15: Applied Statistical Mathematics (80)                               |
|                                         | A16: Operations Research (80)                                           |
|                                         | A17: Combinatorial Mathematics (80)                                     |
|                                         | A18: Fuzzy Mathematics (80)                                             |
|                                         | A19: Computational Mathematics (80)                                     |
|                                         | A20: Applied Mathematics (80)                                           |
| Information Science and Systems Science | A21: Basic Disciplines of Information Science and Systems Science (120) |
|                                         | A22: Systems Science (73)                                               |
|                                         | A23: Control Theory (80)                                                |
|                                         | A24: System Evaluation and Feasibility Analysis (80)                    |
|                                         | A25: Systems Engineering Methodology (72)                               |
| Mechanics                               | A26: Basic Mechanics (141)                                              |
|                                         | A27: Fluid Mechanics (1334)                                             |
| Physics                                 | A28: History of Physics (23)                                            |
|                                         | A29: Theoretical Physics (59)                                           |
|                                         | A30: Acoustics (25)                                                     |
|                                         | A31: Thermodynamics (488)                                               |
|                                         | A32: Optics (30)                                                        |
|                                         | A33: Electromagnetism (404)                                             |
|                                         | A34: Electronic Physics (108)                                           |
|                                         | A35: Condensed Matter Physics (95)                                      |
|                                         | A36: Atomic and Molecular Physics (85)                                  |
|                                         | A37: Computational Physics (35)                                         |
|                                         | A38: Applied Physics (202)                                              |
| Chemistry                               | A39: Inorganic Chemistry (156)                                          |
|                                         | A40: Organic Chemistry (24)                                             |
|                                         | A41: Analytical Chemistry (31)                                          |
|                                         | A42: Physical Chemistry (604)                                           |
|                                         | A43: Polymer Physics (30)                                               |
|                                         | A44: Materials Chemistry (61)                                           |
|                                         | A45: History of Chemistry (86)                                          |
|                                         | A46: Chemical Physics (70)                                              |
|                                         | A47: Polymer Chemistry (71)                                             |
|                                         | A48: Nuclear Chemistry (80)                                             |
|                                         | A49: Applied Chemistry (80)                                             |

| Natural Sciences |                                     |
|------------------|-------------------------------------|
| Field            | Subfield                            |
| Astronomy        | A50: Celestial Mechanics (72)       |
|                  | A51: Astrophysics (70)              |
|                  | A52: Cosmochemistry (70)            |
|                  | A55: Galaxies and Cosmology (80)    |
|                  | A53: Stellar Evolution (80)         |
|                  | A54: Stars and the Milky Way (80)   |
|                  | A56: The Sun and Solar System (76)  |
|                  | A57: Astrogeodynamics (80)          |
| Earth Science    | A58: Chronometry (80)               |
|                  | A59: Geology (153)                  |
|                  | A60: Atmospheric Science (70)       |
|                  | A61: Solid Earth Geophysics (80)    |
|                  | A62: Space Physics (80)             |
|                  | A63: Geochemistry (80)              |
|                  | A64: Geodesy (80)                   |
|                  | A65: Cartography (79)               |
| Biology          | A66: Geography (80)                 |
|                  | A67: Hydrology (77)                 |
|                  | A68: Ocean Science (82)             |
|                  | A69: Biophysics (21)                |
|                  | A70: Biochemistry (48)              |
|                  | A71: Cell Biology (70)              |
|                  | A72: Immunology (42)                |
|                  | A73: Physiology (108)               |
|                  | A74: Developmental Biology (171)    |
|                  | A75: Genetics (43)                  |
|                  | A76: Molecular Biology (67)         |
|                  | A77: Evolutionary Biology (44)      |
|                  | A78: Ecology (565)                  |
|                  | A79: Neurobiology (46)              |
|                  | A80: Botany (1697)                  |
|                  | A81: Entomology (734)               |
| Psychology       | A82: Zoology (1007)                 |
|                  | A83: Microbiology (513)             |
|                  | A84: Virology (22)                  |
|                  | A85: Anthropology (21)              |
|                  | A86: Social Psychology (167)        |
|                  | A87: Developmental Psychology (916) |
|                  | A88: Psychometrics (366)            |
| Psychology       | A89: Physiological Psychology (454) |
|                  | A90: Managerial Psychology (169)    |
|                  | A91: Educational Psychology (319)   |

## 2. AGRICULTURAL SCIENCE

| Agricultural Science                    |                                                                        |
|-----------------------------------------|------------------------------------------------------------------------|
| Field                                   | Subfield                                                               |
| Agronomy                                | B1: Basic Agricultural Sciences (1136)                                 |
|                                         | B2: Crop Science (84)                                                  |
|                                         | B3: History of Agriculture (90)                                        |
|                                         | B4: Horticulture (79)                                                  |
|                                         | B5: Storage and Processing of Agricultural Products (75)               |
|                                         | B6: Soil Science (76)                                                  |
|                                         | B7: Plant Protection Science (79)                                      |
| Forestry                                | B8: Landscape Architecture (822)                                       |
|                                         | B9: Forest Genetics and Breeding (80)                                  |
|                                         | B10: Silviculture (80)                                                 |
|                                         | B11: Forest Management (80)                                            |
|                                         | B12: Forest Protection (80)                                            |
|                                         | B13: Wildlife Conservation and Management (80)                         |
|                                         | B14: Forest Statistics (80)                                            |
| Animal Husbandry and Veterinary Science | B15: Forestry Economics (80)                                           |
|                                         | B16: Veterinary Medicine (1753)                                        |
|                                         | B17: Basic Disciplines of Animal Husbandry and Veterinary Science (80) |
| Aquaculture                             | B18: Animal Husbandry Science (80)                                     |
|                                         | B19: Aquafeed Science (75)                                             |
|                                         | B20: Aquatic Conservation (71)                                         |
|                                         | B21: Fisheries Science (80)                                            |
|                                         | B22: Storage and Processing of Aquatic Products (73)                   |
|                                         | B23: Aquaculture Engineering (80)                                      |
|                                         | B24: Aquatic Resources Science (73)                                    |

## 3. MEDICAL SCIENCE

| Medical Science                                 |                                                 |
|-------------------------------------------------|-------------------------------------------------|
| Field                                           | Subfield                                        |
| Basic Medical Sciences                          | C1: History of Medicine (35)                    |
|                                                 | C2: Human Anatomy (1358)                        |
|                                                 | C3: Human Physiology (108)                      |
|                                                 | C4: Radiology (1597)                            |
|                                                 | C5: Medical Parasitology (159)                  |
|                                                 | C6: Medical Microbiology (1147)                 |
|                                                 | C7: Pathology (388)                             |
|                                                 | C8: Medical Laboratory Animal Science (247)     |
| Clinical Medicine                               | C9: Clinical Diagnostics (90)                   |
|                                                 | C10: Preventive Medicine (58)                   |
|                                                 | C11: Anesthesiology (183)                       |
|                                                 | C12: Internal Medicine (549)                    |
|                                                 | C13: Surgery (1263)                             |
|                                                 | C14: Ophthalmology (514)                        |
|                                                 | C15: Stomatology (2186)                         |
|                                                 | C16: Nuclear Medicine (188)                     |
|                                                 | C17: General Practice (120)                     |
|                                                 | C18: Nursing (520)                              |
|                                                 | C19: Environmental Medicine (281)               |
|                                                 | C20: Health Statistics (578)                    |
|                                                 | C21: Nutrition (80)                             |
|                                                 | C22: Toxicology (75)                            |
|                                                 | C23: Disinfection Science (80)                  |
|                                                 | C24: Epidemiology (80)                          |
|                                                 | C25: Vector Biology Control (80)                |
|                                                 | C26: Occupational Disease (80)                  |
| Preventive Medicine and Public Health           | C27: Endemic Disease (80)                       |
|                                                 | C28: Social Medicine (80)                       |
|                                                 | C29: Health Inspection (78)                     |
|                                                 | C30: Food Hygiene (72)                          |
|                                                 | C31: Environmental Hygiene (79)                 |
|                                                 | C32: Eugenics (80)                              |
|                                                 | C33: Health Promotion and Health Education (80) |
|                                                 | C34: Health Management (80)                     |
| Military and Special Medicine                   | C35: Military Medicine (70)                     |
|                                                 | C36: Special Medicine (72)                      |
| Pharmacy                                        | C37: Medicinal Chemistry (2041)                 |
|                                                 | C38: Pharmaceuticals (24)                       |
|                                                 | C39: Pharmaceutical Administration (888)        |
| Traditional Chinese Medicine and Materia Medica | C40: Traditional Chinese Medicine (3226)        |
|                                                 | C41: Chinese Materia Medica (2362)              |

## 4. ENGINEERING AND TECHNOLOGICAL SCIENCES

| Engineering and Technological Sciences                                |                                                            |
|-----------------------------------------------------------------------|------------------------------------------------------------|
| Field                                                                 | Subfield                                                   |
| Basic Disciplines of Engineering and Technological Sciences           | D1: Engineering Mechanics (50)                             |
|                                                                       | D2: Engineering Geology (81)                               |
|                                                                       | D3: Engineering Mathematics (76)                           |
|                                                                       | D4: Engineering Cybernetics (80)                           |
|                                                                       | D5: Engineering Hydrology (80)                             |
|                                                                       | D6: Engineering Bionics (80)                               |
|                                                                       | D7: Engineering Psychology (80)                            |
|                                                                       | D8: Standards Science and Technology (80)                  |
|                                                                       | D9: Metrology (80)                                         |
|                                                                       | D10: Exploration Technology (80)                           |
|                                                                       | D11: General Engineering Technology (80)                   |
|                                                                       | D12: Industrial Engineering (80)                           |
| Engineering and Technology Related to Information and Systems Science | D13: Control Science and Technology (98)                   |
|                                                                       | D14: Information Security Technology (761)                 |
|                                                                       | D15: Systematic Application of Information Technology (82) |
|                                                                       | D16: Simulation Science and Technology (80)                |
| Engineering and Technology Related to Natural Sciences                | D17: Engineering and Technology Related to Physics (70)    |
|                                                                       | D18: Optical Engineering (125)                             |
|                                                                       | D19: Marine Engineering and Technology (80)                |
|                                                                       | D20: Bioengineering (79)                                   |
| Surveying and Mapping Science and Technology                          | D21: Agricultural Engineering (83)                         |
|                                                                       | D22: Geodetic Surveying Technology (87)                    |
|                                                                       | D23: Photogrammetry and Remote Sensing Technology (72)     |
|                                                                       | D24: Cartographic Technology (89)                          |
| Materials Science                                                     | D25: Engineering Surveying Technology (540)                |
|                                                                       | D26: Marine Surveying (80)                                 |
|                                                                       | D27: Basic Disciplines of Materials Science (327)          |
|                                                                       | D28: Surveying Instruments (80)                            |
|                                                                       | D29: Material Surfaces and Interfaces (70)                 |
|                                                                       | D30: Material Failure and Protection (80)                  |
|                                                                       | D31: Material Testing and Analysis Technology (72)         |
|                                                                       | D32: Material Experiments (80)                             |
|                                                                       | D33: Material Synthesis and Processing Technology (80)     |
|                                                                       | D34: Metallic Materials (79)                               |
|                                                                       | D35: Inorganic Non-Metallic Materials (72)                 |
|                                                                       | D36: Organic Polymer Materials (77)                        |
|                                                                       | D37: Composite Materials (74)                              |
|                                                                       | D38: Biomaterials (75)                                     |
|                                                                       | D39: Nanomaterials (80)                                    |

| Engineering and Technological Sciences |                                                                            |
|----------------------------------------|----------------------------------------------------------------------------|
| Field                                  | Subfield                                                                   |
| Mining Engineering Technology          | D40: Mining Geology (88)                                                   |
|                                        | D41: Mine Surveying (70)                                                   |
|                                        | D42: Mine Design (75)                                                      |
|                                        | D43: Surface Mining Engineering (78)                                       |
|                                        | D44: Underground Mining Engineering (80)                                   |
|                                        | D45: Mining Engineering (86)                                               |
|                                        | D46: Mineral Processing Engineering (78)                                   |
|                                        | D47: Drilling Engineering (80)                                             |
|                                        | D48: Oil and Gas Field Development Engineering (84)                        |
|                                        | D49: Petroleum and Natural Gas Storage and Transportation Engineering (83) |
|                                        | D50: Mining Machinery Engineering (80)                                     |
|                                        | D51: Mining Electrical Engineering (80)                                    |
|                                        | D52: Mining Environmental Engineering (87)                                 |
|                                        | D53: Mine Safety (93)                                                      |
|                                        | D54: Comprehensive Utilization of Mining Resources Engineering (84)        |
| Metallurgical Engineering Technology   | D55: Metallurgical Physical Chemistry (72)                                 |
|                                        | D56: Metallurgical Thermal Engineering (80)                                |
|                                        | D57: Metallurgical Technology (70)                                         |
|                                        | D58: Ferrous Metallurgy (70)                                               |
|                                        | D59: Non-Ferrous Metallurgy (70)                                           |
|                                        | D60: Rolling (80)                                                          |
| Mechanical Engineering                 | D61: Metallurgical Machinery and Automation (70)                           |
|                                        | D62: Mechanical Design (1941)                                              |
|                                        | D63: Mechanical Manufacturing Processes and Equipment (231)                |
|                                        | D64: Cutting Tool Technology (80)                                          |
|                                        | D65: Machine Tool Technology (80)                                          |
|                                        | D66: Fluid Transmission and Control (83)                                   |
|                                        | D67: Mechanical Manufacturing Automation (80)                              |
| Power and Electrical Engineering       | D68: Electrical Engineering (681)                                          |
|                                        | D69: Engineering Thermophysics (80)                                        |
|                                        | D70: Thermal Engineering (80)                                              |
|                                        | D71: Power Machinery Engineering (80)                                      |
|                                        | D72: Refrigeration and Cryogenic Engineering (80)                          |

| Engineering and Technological Sciences   |                                                                 |
|------------------------------------------|-----------------------------------------------------------------|
| Field                                    | Subfield                                                        |
| Energy Science and Technology            | D73: Energy Chemistry (72)                                      |
|                                          | D74: Energy Computing and Measurement (80)                      |
|                                          | D75: Energy Storage Technology (80)                             |
|                                          | D76: Energy-Saving Technology (80)                              |
| Nuclear Science and Technology           | D77: Nuclear Detection Technology and Nuclear Electronics (70)  |
|                                          | D78: Radiometric Metrology (70)                                 |
|                                          | D79: Nuclear Instruments and Equipment (78)                     |
|                                          | D80: Nuclear Materials and Process Technology (70)              |
|                                          | D81: Particle Accelerators (70)                                 |
|                                          | D82: Fission Reactor Engineering Technology (70)                |
|                                          | D83: Nuclear Fusion Engineering Technology (80)                 |
|                                          | D84: Nuclear Power Engineering Technology (79)                  |
|                                          | D85: Isotope Technology (95)                                    |
|                                          | D86: Nuclear Explosion Engineering (92)                         |
|                                          | D87: Nuclear Safety (80)                                        |
|                                          | D88: Spent Fuel Reprocessing Technology (80)                    |
|                                          | D89: Radiation Protection Technology (80)                       |
|                                          | D90: Nuclear Facility Decommissioning Technology (80)           |
|                                          | D91: Radioactive Waste Treatment and Disposal Technology (80)   |
| Electronics and Communication Technology | D92: Electronic Technology (736)                                |
|                                          | D93: Information Processing Technology (27)                     |
|                                          | D94: Communication Technology (50)                              |
|                                          | D95: Optoelectronics and Laser Technology (81)                  |
|                                          | D96: Semiconductor Technology (80)                              |
|                                          | D97: Broadcasting and Television Engineering Technology (80)    |
|                                          | D98: Radar Engineering (80)                                     |
|                                          | D99: Basic Disciplines of Computer Science and Technology (922) |
| Computer Science and Technology          | D100: Computer System Architecture (999)                        |
|                                          | D101: Computer Software (228)                                   |
|                                          | D102: Computer Engineering (41)                                 |
|                                          | D103: Computer Applications (285)                               |

| Engineering and Technological Sciences                     |                                                                         |
|------------------------------------------------------------|-------------------------------------------------------------------------|
| Field                                                      | Subfield                                                                |
| Chemical Engineering                                       | D104: Basic Disciplines of Chemical Engineering (64)                    |
|                                                            | D105: Chemical Measurement Technology and Instrumentation (80)          |
|                                                            | D106: Chemical Transport Processes (80)                                 |
|                                                            | D107: Chemical Separation Engineering (80)                              |
|                                                            | D108: Chemical Reaction Engineering (80)                                |
|                                                            | D109: Chemical Systems Engineering (80)                                 |
|                                                            | D110: Chemical Machinery and Equipment (75)                             |
|                                                            | D111: Inorganic Chemical Engineering (74)                               |
|                                                            | D112: Organic Chemical Engineering (80)                                 |
|                                                            | D113: Electrochemical Engineering (77)                                  |
|                                                            | D114: Coal Chemical Engineering (79)                                    |
|                                                            | D115: Petrochemical Engineering (79)                                    |
| Engineering and Technology Related to Product Applications | D116: Natural Gas Chemical Engineering (80)                             |
|                                                            | D117: Fine Chemical Engineering (76)                                    |
|                                                            | D118: Papermaking Technology (86)                                       |
|                                                            | D119: Fur and Leather Engineering (83)                                  |
| Textile Science and Technology                             | D120: Pharmaceutical Engineering (127)                                  |
|                                                            | D121: Biochemical Engineering (116)                                     |
|                                                            | D122: Product-Specific Application Technology (21)                      |
|                                                            | D123: Instrumentation Technology (80)                                   |
|                                                            | D124: Weapons Science and Technology (90)                               |
|                                                            | D125: Textile Materials (80)                                            |
|                                                            | D126: Fiber Manufacturing Technology (80)                               |
|                                                            | D127: Textile Technology (80)                                           |
|                                                            | D128: Dyeing and Finishing Technology (80)                              |
|                                                            | D129: Clothing Technology (80)                                          |
| Food Science and Technology                                | D130: Textile Machinery and Equipment (80)                              |
|                                                            | D131: Basic Disciplines of Food Science and Technology (80)             |
|                                                            | D132: Food Packaging and Storage (77)                                   |
|                                                            | D133: Food Machinery (80)                                               |
|                                                            | D134: Processing and Utilization of By-Products in Food Processing (80) |
|                                                            | D135: Food Industry Business Management (86)                            |
|                                                            | D136: Food Engineering and Grain and Oil Engineering (80)               |

| Engineering and Technological Sciences |                                                                               |
|----------------------------------------|-------------------------------------------------------------------------------|
| Field                                  | Subfield                                                                      |
| Civil and Architectural Engineering    | D137: History of Architecture (85)                                            |
|                                        | D138: Building Materials (175)                                                |
|                                        | D139: Civil and Architectural Structures (108)                                |
|                                        | D140: Civil and Architectural Engineering Design (235)                        |
|                                        | D141: Basic Disciplines of Civil and Architectural Engineering (80)           |
|                                        | D142: Civil and Architectural Engineering Surveying (80)                      |
|                                        | D143: Engineering Structures (80)                                             |
|                                        | D144: Civil and Architectural Engineering Construction (80)                   |
|                                        | D145: Civil Engineering Machinery and Equipment (80)                          |
|                                        | D146: Municipal Engineering (80)                                              |
|                                        | D147: Architectural Economics (80)                                            |
| Hydraulic Engineering                  | D148: Basic Disciplines of Hydraulic Engineering (173)                        |
|                                        | D149: Hydraulic Engineering Surveying (70)                                    |
|                                        | D150: Hydraulic Materials (79)                                                |
|                                        | D151: Hydraulic Structures (80)                                               |
|                                        | D152: Hydraulic Machinery (74)                                                |
|                                        | D153: Hydraulic Engineering Construction (92)                                 |
|                                        | D154: River Sediment Engineering (85)                                         |
|                                        | D155: Environmental Hydraulics (96)                                           |
|                                        | D156: Water Resources Management (72)                                         |
|                                        | D157: Flood Control Engineering (78)                                          |
| Transportation Engineering             | D158: Hydraulic Economics (69)                                                |
|                                        | D159: Road Engineering (79)                                                   |
|                                        | D160: Highway Transportation (76)                                             |
|                                        | D161: Railway Transportation (80)                                             |
|                                        | D162: Waterway Transportation (80)                                            |
|                                        | D163: Ship and Vessel Engineering (80)                                        |
|                                        | D164: Air Transportation (80)                                                 |
|                                        | D165: Transportation Systems Engineering (80)                                 |
|                                        | D166: Transportation Safety Engineering (80)                                  |
|                                        | D167: Basic Disciplines of Aviation and Aerospace Science and Technology (80) |
|                                        | D168: Aircraft Structure and Design (80)                                      |
|                                        | D169: Spacecraft Structure and Design (80)                                    |
|                                        | D170: Aviation and Aerospace Propulsion Systems (80)                          |

| Engineering and Technological Sciences                                   |                                                                           |
|--------------------------------------------------------------------------|---------------------------------------------------------------------------|
| Field                                                                    | Subfield                                                                  |
| Aviation and Aerospace Science and Technology                            | D171: Aircraft Instruments and Equipment (80)                             |
|                                                                          | D172: Aircraft Control and Navigation Technology (78)                     |
|                                                                          | D173: Aviation and Aerospace Materials (80)                               |
|                                                                          | D174: Aircraft Manufacturing Technology (84)                              |
|                                                                          | D175: Aircraft Testing Technology (80)                                    |
|                                                                          | D176: Aircraft Launch, Recovery, and Flight Technology (84)               |
|                                                                          | D177: Aviation and Aerospace Ground Facilities and Technical Support (79) |
|                                                                          | D178: Aviation and Aerospace Systems Engineering (89)                     |
| Environmental Science and Technology and Resource Science and Technology | D179: Basic Disciplines of Environmental Science and Technology (203)     |
|                                                                          | D180: Environmental Science (138)                                         |
|                                                                          | D181: Environmental Engineering (493)                                     |
|                                                                          | D182: Resource Science and Technology (24)                                |
|                                                                          | D183: Public Safety (259)                                                 |
|                                                                          | D184: Basic Disciplines of Safety Science and Technology (70)             |
|                                                                          | D185: Safety Social Science (75)                                          |
|                                                                          | D186: Safety Material Science (75)                                        |
| Safety Science and Technology                                            | D187: Safety Ergonomics (83)                                              |
|                                                                          | D188: Safety Systems Science (82)                                         |
|                                                                          | D189: Safety Engineering Technology (78)                                  |
|                                                                          | D190: Safety and Health Engineering Technology (82)                       |
|                                                                          | D191: Safety Social Engineering (83)                                      |
|                                                                          | D192: Sector-Specific Safety Engineering Theory (96)                      |
|                                                                          | D193: History of Management Thought (84)                                  |
|                                                                          | D194: Management Theory (80)                                              |
| Management Science                                                       | D195: Management Metrology (81)                                           |
|                                                                          | D196: Sector Economic Management (80)                                     |
|                                                                          | D197: Regional Economic Management (80)                                   |
|                                                                          | D198: Science and Technology Management (80)                              |
|                                                                          | D199: Public Administration (80)                                          |
|                                                                          | D200: Human Resource Development and Management (80)                      |
|                                                                          | D201: Futures Studies (80)                                                |
|                                                                          | D202: Enterprise Management (600)                                         |
|                                                                          | D203: Management Engineering (71)                                         |

## 5. HUMANITIES AND SOCIAL SCIENCES

| Humanities and Social Sciences |                                                              |
|--------------------------------|--------------------------------------------------------------|
| Field                          | Subfield                                                     |
| Marxism                        | E1: Studies on Marx, Engels, Lenin, and Stalin (103)         |
|                                | E2: Scientific Socialism (88)                                |
|                                | E3: Foreign Marxism Studies (81)                             |
|                                | E4: Mao Zedong Thought Studies (888)                         |
|                                | E5: History of Marxist Thought (416)                         |
|                                | E6: History of Socialist Movements (104)                     |
| Philosophy                     | E7: Marxist Philosophy (769)                                 |
|                                | E8: History of Chinese Philosophy (21)                       |
|                                | E9: History of Western Philosophy (548)                      |
|                                | E10: Modern Foreign Philosophy (1)                           |
|                                | E11: Logic (368)                                             |
|                                | E12: Ethics (69)                                             |
|                                | E13: Aesthetics (976)                                        |
| Religious Studies              | E14: Religious Theory (60)                                   |
|                                | E15: Primitive Religions (80)                                |
|                                | E16: Ancient Religions (80)                                  |
|                                | E17: Buddhism (70)                                           |
|                                | E18: Christianity (74)                                       |
|                                | E19: Islam (80)                                              |
|                                | E20: Taoism (80)                                             |
|                                | E21: Judaism (80)                                            |
|                                | E22: Hinduism (80)                                           |
|                                | E23: Zoroastrianism (80)                                     |
|                                | E24: Manichaeism (80)                                        |
| Linguistics                    | E25: General Linguistics (199)                               |
|                                | E26: Comparative Linguistics (44)                            |
|                                | E27: Linguistic Geography (26)                               |
|                                | E28: Sociolinguistics (86)                                   |
|                                | E29: Psycholinguistics (52)                                  |
|                                | E30: Applied Linguistics (861)                               |
|                                | E31: Chinese Language Studies (439)                          |
|                                | E32: Languages and Scripts of Chinese Ethnic Minorities (24) |
|                                | E33: Foreign Languages (202)                                 |
| Literature                     | E34: Literary Theory (231)                                   |
|                                | E35: Literary Aesthetics (99)                                |
|                                | E36: Literary Criticism (89)                                 |
|                                | E37: Comparative Literature (81)                             |
|                                | E38: Modern Chinese Literature (80)                          |
|                                | E39: Ancient Chinese Literature (355)                        |
|                                | E40: Chinese Genre Literature (82)                           |
|                                | E41: Chinese Folklore Literature (80)                        |
|                                | E42: Literature of Chinese Ethnic Minorities (80)            |
|                                | E43: World Literature History (80)                           |
|                                | E44: Eastern Literature (80)                                 |

| Humanities and Social Sciences |                                          |
|--------------------------------|------------------------------------------|
| Field                          | Subfield                                 |
|                                | E45: Russian Literature (80)             |
|                                | E46: Chinese Children's Literature (390) |
|                                | E47: British Literature (81)             |
|                                | E48: French Literature (81)              |
|                                | E49: German Literature (21)              |
|                                | E50: Art Psychology (82)                 |
|                                | E51: Music (36)                          |
|                                | E52: Drama (45)                          |
|                                | E53: Traditional Chinese Opera (31)      |
|                                | E54: Dance (30)                          |
| Art Studies                    | E55: Film (29)                           |
|                                | E56: Radio and Television Arts (21)      |
|                                | E57: Fine Arts (869)                     |
|                                | E58: Applied Arts (46)                   |
|                                | E59: Calligraphy (26)                    |
|                                | E60: Photography (27)                    |
|                                | E61: Ancient Chinese History (66)        |
|                                | E62: World General History (82)          |
|                                | E63: Asian History (76)                  |
| History                        | E64: African History (21)                |
|                                | E65: European History (87)               |
|                                | E66: Historiography Theory (80)          |
|                                | E67: Historical Documentation (72)       |
|                                | E68: General Chinese History (80)        |
|                                | E69: Archaeological Theory (81)          |
|                                | E70: History of Archaeology (80)         |
|                                | E71: Archaeological Technology (80)      |
| Archaeology                    | E72: Chinese Archaeology (26)            |
|                                | E73: Foreign Archaeology (30)            |
|                                | E74: Specialized Archaeology (22)        |
|                                | E75: Political Economics (21)            |
|                                | E76: Economic Geography (29)             |
|                                | E77: Developmental Economics (87)        |
|                                | E78: Economic History (691)              |
|                                | E79: World Economics (462)               |
|                                | E80: Management Economics (21)           |
|                                | E81: Accounting (718)                    |
| Economics                      | E82: Technical Economics (328)           |
|                                | E83: Labor Economics (22)                |
|                                | E84: Urban Economics (229)               |
|                                | E85: Resource Economics (21)             |
|                                | E86: Logistics Economics (644)           |
|                                | E87: Commercial Economics (418)          |
|                                | E88: Information Economics (544)         |
|                                | E89: Public Finance (427)                |
|                                | E90: Finance (404)                       |

| Humanities and Social Sciences       |                                               |
|--------------------------------------|-----------------------------------------------|
| Field                                | Subfield                                      |
| Political Science                    | E91: Political Science Theory (303)           |
|                                      | E92: Political Systems (87)                   |
|                                      | E93: Public Administration (398)              |
|                                      | E94: International Politics (84)              |
| Law                                  | E95: Theoretical Jurisprudence (376)          |
|                                      | E96: Legal History (155)                      |
|                                      | E97: Sectoral Law (6471)                      |
|                                      | E98: International Law (476)                  |
| Military Science                     | E99: Military Theory (80)                     |
|                                      | E100: Military History (80)                   |
|                                      | E101: Military Psychology (80)                |
|                                      | E102: Strategic Studies (80)                  |
|                                      | E103: Operational Studies (80)                |
|                                      | E104: Tactical Studies (80)                   |
|                                      | E105: Military Command Studies (80)           |
|                                      | E106: Military Organization Studies (80)      |
|                                      | E107: Military Political Work Studies (80)    |
|                                      | E108: Military Logistics (80)                 |
|                                      | E109: Military Geography (80)                 |
|                                      | E110: Military Technology (80)                |
| Sociology                            | E111: History of Sociology (48)               |
|                                      | E112: Sociological Theory (1089)              |
|                                      | E113: Sociological Methods (324)              |
|                                      | E114: Experimental Sociology (21)             |
|                                      | E115: Applied Sociology (1016)                |
|                                      | E116: Social Geography (30)                   |
|                                      | E117: Cultural Sociology (45)                 |
|                                      | E118: Economic Sociology (56)                 |
|                                      | E119: Social Anthropology (63)                |
|                                      | E120: Organizational Sociology (168)          |
|                                      | E121: Developmental Sociology (34)            |
|                                      | E122: Welfare Sociology (115)                 |
|                                      | E123: Demography (8)                          |
|                                      | E124: Labor Science (29)                      |
| Ethnology and Cultural Studies       | E125: Cultural Anthropology and Folklore (79) |
|                                      | E126: Cultural Studies (86)                   |
|                                      | E127: Tibetology (95)                         |
|                                      | E128: Xinjiang Ethnic Studies (85)            |
|                                      | E129: World Ethnic Studies (47)               |
| Journalism and Communication Studies | E130: Journalism Theory (170)                 |
|                                      | E131: History of Journalism (872)             |
|                                      | E132: Journalism Practice (35)                |
|                                      | E133: Journalism Business Management (92)     |
|                                      | E134: Radio and Television (81)               |
|                                      | E135: Communication Studies (458)             |
|                                      | E136: Journalism Operations (80)              |

| Humanities and Social Sciences                  |                                                    |
|-------------------------------------------------|----------------------------------------------------|
| Field                                           | Subfield                                           |
| Education                                       | E137: History of Education (592)                   |
|                                                 | E138: Principles of Education (82)                 |
|                                                 | E139: Teaching Methodology (56)                    |
|                                                 | E140: Moral Education Principles (590)             |
|                                                 | E141: Educational Sociology (339)                  |
|                                                 | E142: Educational Management (26)                  |
|                                                 | E143: Educational Technology (2125)                |
|                                                 | E144: General Education (277)                      |
|                                                 | E145: Vocational and Technical Education (34)      |
| Sports Science                                  | E146: Exercise Physiology (907)                    |
|                                                 | E147: History of Sports (86)                       |
|                                                 | E148: Sports Theory (80)                           |
|                                                 | E149: Sports Biomechanics (81)                     |
|                                                 | E150: Sports Psychology (80)                       |
|                                                 | E151: Sports Health Science (80)                   |
|                                                 | E152: Physical Education (80)                      |
| Statistics                                      | E153: Economic Statistics (70)                     |
|                                                 | E154: Science and Technology Statistics (85)       |
|                                                 | E155: Environmental and Ecological Statistics (80) |
|                                                 | E156: Biological and Medical Statistics (82)       |
| Library, Information, and Documentation Science | E157: Biological and Medical Statistics (82)       |
|                                                 | E158: Information Science (89)                     |
|                                                 | E159: Archival Science (52)                        |
|                                                 | E160: Museum Studies (112)                         |

## E EVALUATION METHOD AND DIFFICULTY LEVEL CALIBRATION

Below we provide the detailed methodology for model evaluation and the calibration process used to assign difficulty levels to the EESE instances, addressing specific reviewer queries.

### E.1 MODEL EVALUATION METHOD

The evaluation process in this study follows the “LLM-as-a-judge” paradigm. Specifically, we first present questions to the model under test and record its responses. These responses, along with the ground-truth answers, are then provided to the judge model GPT-4o, which is explicitly informed of the question type (objective or subjective). For objective questions, a binary scoring criterion is applied, where a correct answer receives 10 points and an incorrect answer receives 0. For subjective questions, the judge model assigns a continuous score between 0 and 10 based on response quality. The scores for all questions are subsequently averaged and normalized to a percentage scale to represent the model’s overall performance.

### E.2 DIFFICULTY LEVEL CALIBRATION

To assess the difficulty level of questions in EESE-Pool, we selected 6 representative models (including DeepSeek-R1, O3, GPT-4o, Grok-3, Gemini-2.5-pro, Qwen2.5-72B-Instruct) and prompted each to answer every question independently. Using GPT-4o as the judge model, we computed the average score achieved by these models on each question. Based on this mean score, questions are classified into three difficulty tiers: those with a score below 4 are labeled as “Hard”, scores from 4 to 7 (inclusive) as “Middle”, and scores exceeding 7 as “Easy”.

## F HUMAN EXPERT RECRUITMENT AND INVOLVEMENT

This appendix details the protocols for recruiting human experts and their involvement in the construction of the EESE benchmark, covering recruitment, task specifications, compensation, and ethical considerations.

### F.1 RECRUITMENT AND QUALIFICATION

**Recruitment Method:** Experts were primarily recruited through our academic collaboration networks, targeting top-tier universities and research institutions to ensure high levels of expertise and reliability.

**Qualification Requirements:** All recruited experts were required to hold a Master’s or Ph.D. degree in a relevant scientific discipline, or to possess several years of high-level teaching or research experience.

### F.2 TASK SPECIFICATIONS AND COMPETENCY REQUIREMENTS

Expert involvement was structured across different stages of data construction and refinement, with tasks categorized by required cognitive load and expertise.

#### F.2.1 DATA ENGINE

**Transcription** Experts collected instances from textbooks, question banks, and online resources, transcribing them into a standardized format. This task required foundational domain knowledge and strict adherence to data formatting and fact-checking protocols.

**Expansion** Experts contributed high-value instances for uncovered subfields by synthesizing field knowledge, practical experience, and pedagogical insights. This demanded high professional competence, with a focus on addressing knowledge gaps and ensuring instance novelty.

**Coarse-grained Quality Control** Experts reviewed and manually modified instances flagged by LLMs for errors in formatting, factual accuracy, or logical coherence. This required critical thinking and a mastery of LLM error review guidelines and difficulty verification standards.

#### F.2.2 DATA REFINEMENT

**Enhancement By Distraction (Low HI)** Experts verified the correctness and relevance of auto-generated distractors, serving as the final fine-grained quality control step. This required **familiarity with subject matter** to ensure distractors were highly discriminative without introducing factual errors.

**Enrichment By Cross-Disciplinary (Medium HI)** Experts conducted a fine-grained review and refinement of interdisciplinary content to ensure factual precision and educational alignment. This demanded the ability to integrate knowledge across disciplines and design complex, yet coherent, interdisciplinary links.

**Expert-Driven Refinement (High HI)** Experts manually rewrote or restructured problems to enhance clarity, embed subtle complexity, or decompose multi-step reasoning, followed by fine-grained quality validation. This task had the highest level of expertise requirement, necessitating the ability to reconstruct complex logical structures and perform meticulous quality validation.

### F.3 COMPENSATION STRUCTURE

To ensure the scientific rigor of the EESE benchmark, significant resources were allocated for human expertise. A total of 609 experts contributed to the construction of the 100K+ instance EESE-Pool.

**Total Investment:** The total cost for the entire construction process was approximately \$428,057.77. The cumulative effort amounted to approximately 30,510 expert-hours.<sup>1</sup>

**Compensation Strategy:** A strict tiered compensation strategy was implemented to align remuneration with the professionalism and complexity of each task. Basic tasks, such as *Transcription* and *Coarse-grained QC*, were compensated at a standard rate. Core tasks demanding high expertise and cognitive load, such as *Expansion* and *Expert-Driven Refinement (High HI)*, were compensated at a premium rate, with a maximum hourly rate of \$45. The average hourly rate across the project was approximately \$14.03.

#### F.4 INFORMED CONSENT

Prior to their involvement, all experts were required to sign an Informed Consent form and a service agreement. These documents clearly outlined the nature of their tasks, the scope of data usage, and the compensation structure. This process ensured that all experts participated in the EESE construction on a fully informed and voluntary basis.

<sup>1</sup>All monetary and hour amounts here are approximate and not exact financial figures.
